# Supplementary material
Source: PubMed Central journal article supplement (PMC8195460)
Supplement: NIHMS1594619-supplement-Suppl_Table_1.pdf [file NIHMS1594619-supplement-Suppl_Table_1.pdf]

Supplemental Table 1

Regression model results of indoor/outdoor ratios of particle number concentration (PNC).

| Covariate                       | Model not including<br>air conditioning |             | Model including<br>air conditioning    |             |
|---------------------------------|-----------------------------------------|-------------|----------------------------------------|-------------|
|                                 | % change in<br>indoor/outdoor<br>ratio  | 95%CI       | % change in<br>indoor/outdoor<br>ratio | 95%CI       |
| Outdoor PNC                     | 2.5 <sup>†*</sup>                       | 0.4, 4.7    | 2.5 <sup>†*</sup>                      | 0.4, 4.7    |
| Wind speed (m/s)                | 5.1*                                    | 3.9, 6.3    | 5.1*                                   | 3.9, 6.3    |
| Wind direction                  |                                         |             |                                        |             |
| Southeast (ref)                 | -                                       |             |                                        |             |
| West                            | 6.1*                                    | 1.9, 10.5   | 6.1*                                   | 1.9, 10.6   |
| Northwest                       | 7.4*                                    | 2.8, 12.1   | 7.4*                                   | 2.9, 12.2   |
| East                            | 9.0*                                    | 4.3, 13.9   | 9.0*                                   | 4.4, 14.0   |
| Hourly temperature<br>> 18.3° C | -7.9*                                   | -10.0, -4.7 | -7.9*                                  | -10.9, -4.7 |
| Air conditioning                |                                         |             |                                        |             |
| None (ref)                      | -                                       | -           | -                                      | -           |
| Window units                    | -                                       | -           | -15.2                                  | -39.8, 19.5 |
| Central air                     | -                                       | -           | -25.0                                  | -48.0, 8.2  |
| Weekday                         | -3.5*                                   | -6.4, -0.5  | -3.4*                                  | -6.3, -0.4  |
| Hour category                   |                                         |             |                                        |             |
| 6pm – midnight (ref)            | -                                       | -           | -                                      | -           |
| Noon-6pm                        | 3.2                                     | -0.1, 6.6   | 3.2                                    | -0.1, 6.6   |
| 6am – noon                      | 5.5*                                    | 2.4, 8.8    | 5.5*                                   | 2.4, 8.8    |
| Midnight-6am                    | -1.3                                    | -4.7, 2.1   | -1.3                                   | -4.7, 2.1   |

Abbreviation: CI, confidence interval.

<sup>†</sup> Corresponds to a 10% increase in indoor/outdoor ratio of particle number concentration.

\* Statistically significant associations (p&lt;0.10).
